# Supplementary material for: Paleo-modeling of coastal saltwater intrusion during the Holocene: an application to the Netherlands
Source: Copernicus journal article supplement (doi:10.5194/hess-18-3891-2014), 2014-10-02
Supplement: Supplementary file 1 [file supplement-cover-letter.pdf › supplement-cover-letter.pdf]

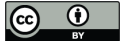

*Supplement of*

## **Paleo-modeling of coastal saltwater intrusion during the Holocene: an application to the Netherlands**

**J. R. Delsman et al.**

*Correspondence to:* J. R. Delsman ([joost.delsman@deltares.nl](mailto:joost.delsman@deltares.nl))

- Supplement-Cover-Letter.pdf
- Cl\_evolutionwmv.avi
